# Supplementary material for: Hif-1α paralogs play a role in the hypoxic ventilatory response of larval and adult zebrafish (Danio rerio)
Source: Oxford University Press journal article supplement (doi:10.1242/jeb.195198), 2018-01-01
Supplement: jeb195198supp.pdf [file jeb195198supp.pdf]

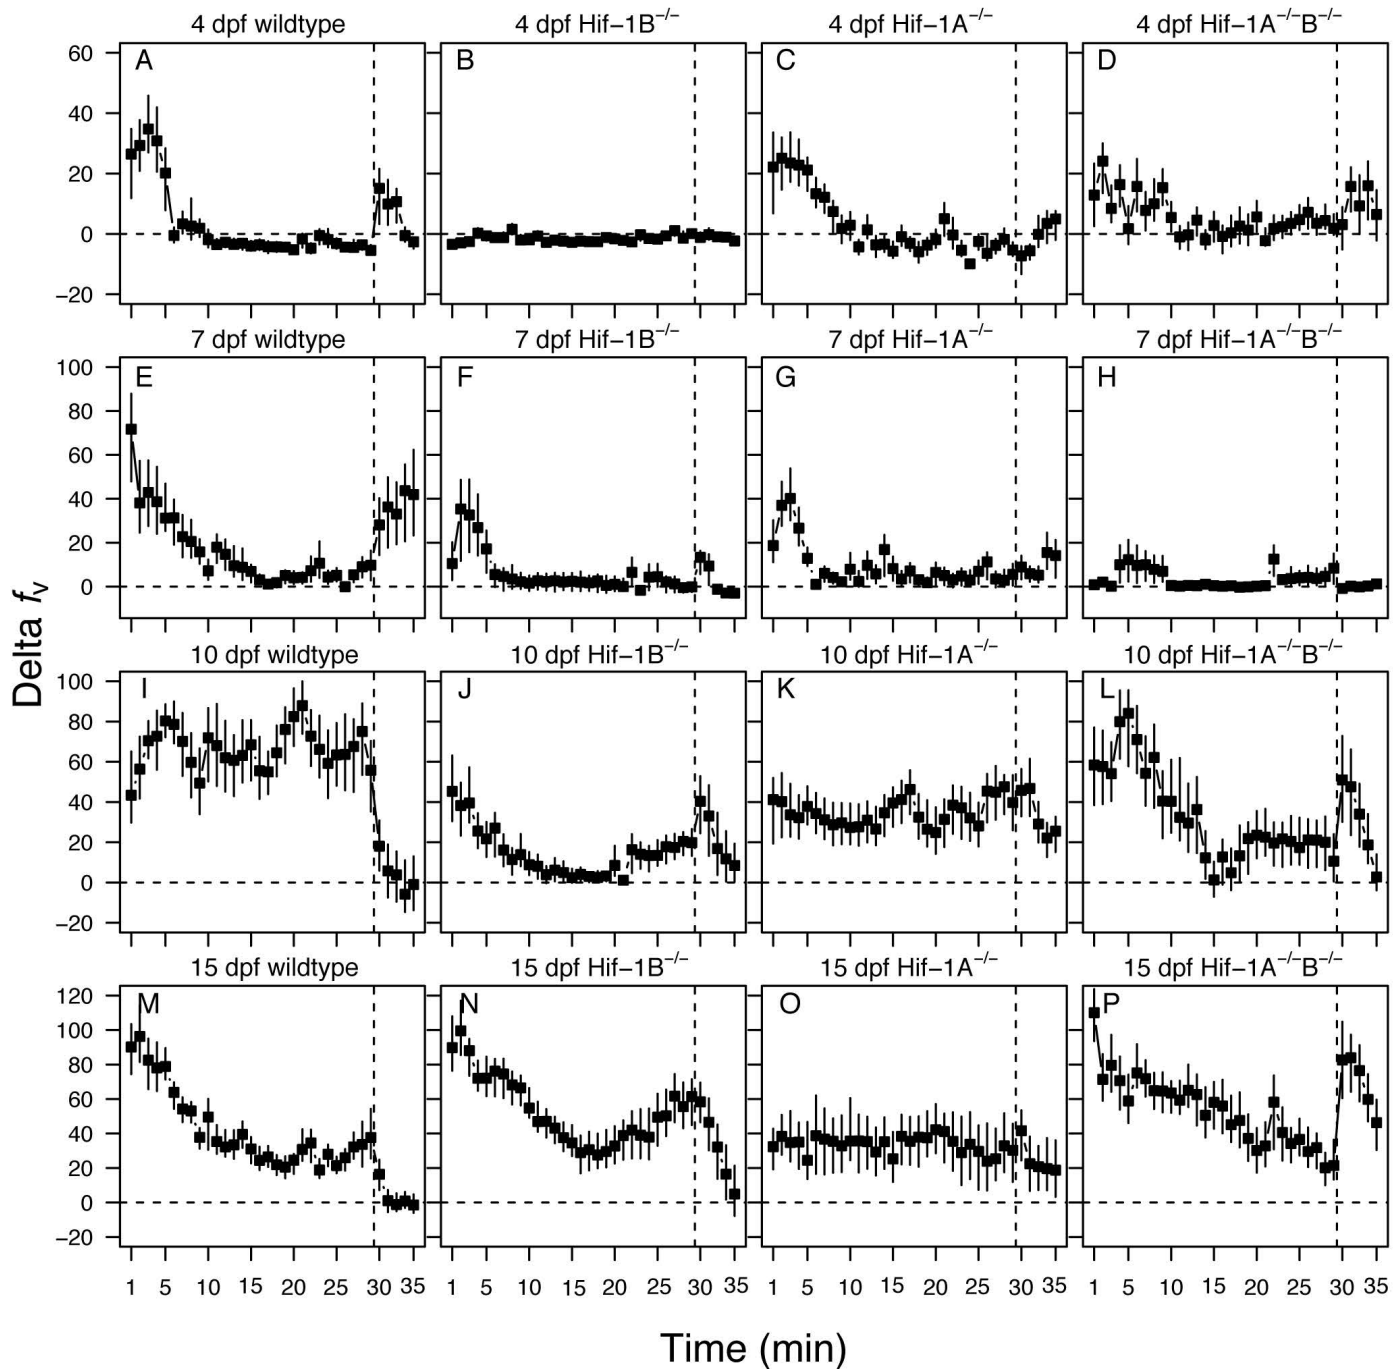

**Figure S1.** The average differences in  $f_v$  ( $\Delta f_v$ ) between normoxia and hypoxia, and normoxia and recovery in wildtype,  $Hif-1B^{-/-}$ ,  $Hif-1A^{-/-}$  and  $Hif-1A^{-/-}B^{-/-}$  larval zebrafish (data based on Figure 1). Panels A-D are larvae at 4 days post fertilization (dpf), panels E-H are larvae at 7 dpf, panels I-L are larvae at 10 dpf and panels M-P are larvae at 15 dpf. Panels A, E, I, M are wildtype larvae, panels B, F, J, N are  $Hif-1B^{-/-}$  larvae, panels C, G, K, O are  $Hif-1A^{-/-}$  larvae, and panels D, H, L, P are  $Hif-1A^{-/-}B^{-/-}$  larvae. Estimates are presented with 95% credible interval based on Bayesian analysis. Data are significant if the 95% CI do not intersect zero (dotted horizontal line).
